# Supplementary material for: SIRT1 protects rat lung tissue against severe burn-induced remote ALI by attenuating the apoptosis of PMVECs via p38 MAPK signaling
Source: PubMed Central journal article supplement (PMC4445725; doi:10.1038/srep10277), 2015-05-20
Supplement: srep10277-s1.pdf [file srep10277-s1.pdf]

**SITR1 protects rat lung tissue against severe burn-induced remote ALI by attenuating the apoptosis of PMVECs via p38 MAPK signaling**

Xiaozhi Bai<sup>1\*</sup>; Lei Fan<sup>1\*</sup>; Ting He<sup>1\*</sup>; Wenbin Jia<sup>1</sup>; Longlong Yang<sup>1</sup>; Jun Zhang<sup>2</sup>; Yang Liu<sup>1</sup>; Jihong Shi<sup>1</sup>; Linlin Su<sup>1#</sup> & Dahai Hu<sup>1#</sup>

<sup>1</sup> Department of Burns and Cutaneous Surgery, Xijing Hospital, Fourth Military Medical University, Xi'an, Shaanxi, China. <sup>2</sup> Department of Burn and Plastic Surgery, No. 205 Hospital of Chinese People's Liberation Army, Jinzhou, Liaoning, China.

\* These authors contributed equally to this work.

**#Corresponding authors:** Dahai Hu, Linlin Su

Address: Department of Burns and Cutaneous Surgery, Xijing Hospital, Fourth Military Medical University, No.127 Changle West Road, Xi'an, 710032, China.

Tel:+86-29-8477 5298

Fax: +86-29-83251734

E-mail address: [burnlab@fmmu.edu.cn](mailto:burnlab@fmmu.edu.cn) or [linlinsu@fmmu.edu.cn](mailto:linlinsu@fmmu.edu.cn)

**Reprint requests:** Dahai Hu

Address: Department of Burns and Cutaneous Surgery, Xijing Hospital, Fourth Military Medical University, No.127 Changle West Road, Xi'an, 710032, China.

E-mail address: [burnlab@fmmu.edu.cn](mailto:burnlab@fmmu.edu.cn)

**Table S1. Primer pairs used for qRT-PCR in this study.**

| <b>Gene</b>                    | <b>Forward Sequence</b>          | <b>Reverse Sequence</b>          |
|--------------------------------|----------------------------------|----------------------------------|
| <i>SIRT1</i>                   | 5'- CAGACCCTCAAGCCATGTTTGATA -3' | 5'- TTGGATTCCTGCAACCTGCTC-3'     |
| <i>TNF-<math>\alpha</math></i> | 5'- GTTCTATGGCCCAGACCCTCAC -3'   | 5'- GGCACCACTAGTTGGTTGTCCTTG -3' |
| <i>IL-1<math>\beta</math></i>  | 5'- TCCAGGATGAGGACATGAGCAC -3'   | 5'- GAACGTCACACACCAGCAGGTTA -3'  |
| <i>GAPDH</i>                   | 5'- TGTGTCCGTCGTGGATCTGA -3'     | 5'-TTGCTGTTGAAGTCGCAGGAG -3'     |
